# Supplementary material
Source: Springer Nature journal article supplement (https://www.springermedizin.de/resource/supplementary/12958_2009_571_MOESM1_ESM.pdf/9568328)
Supplement: MOESM1 [file 9568328]

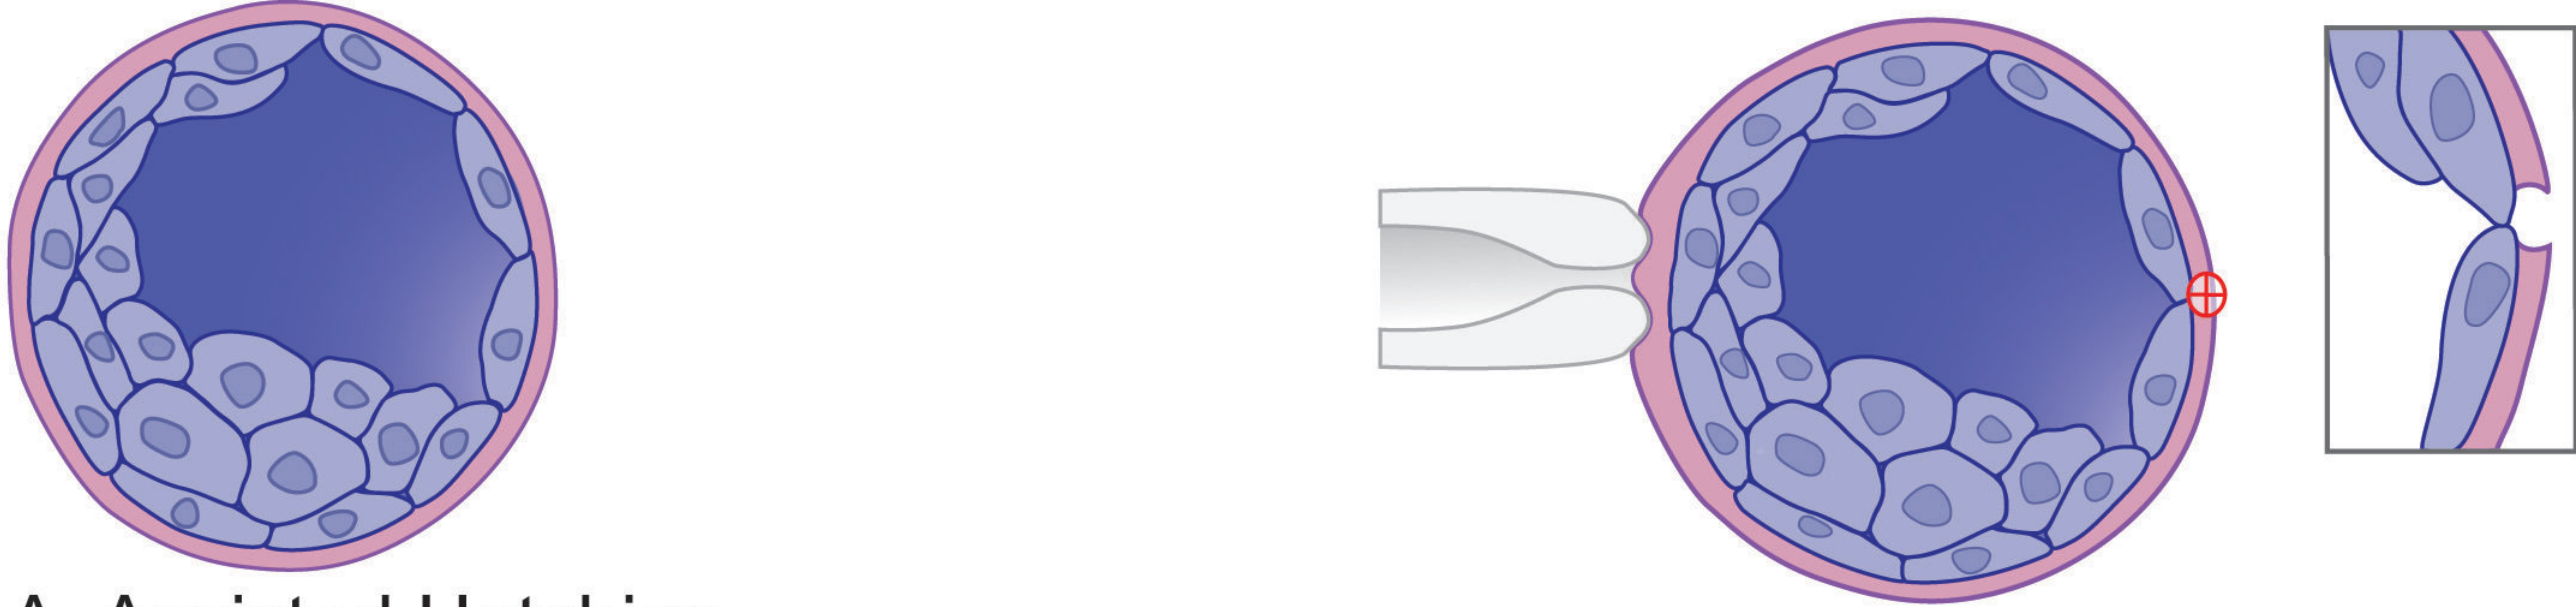

A. Assisted Hatching

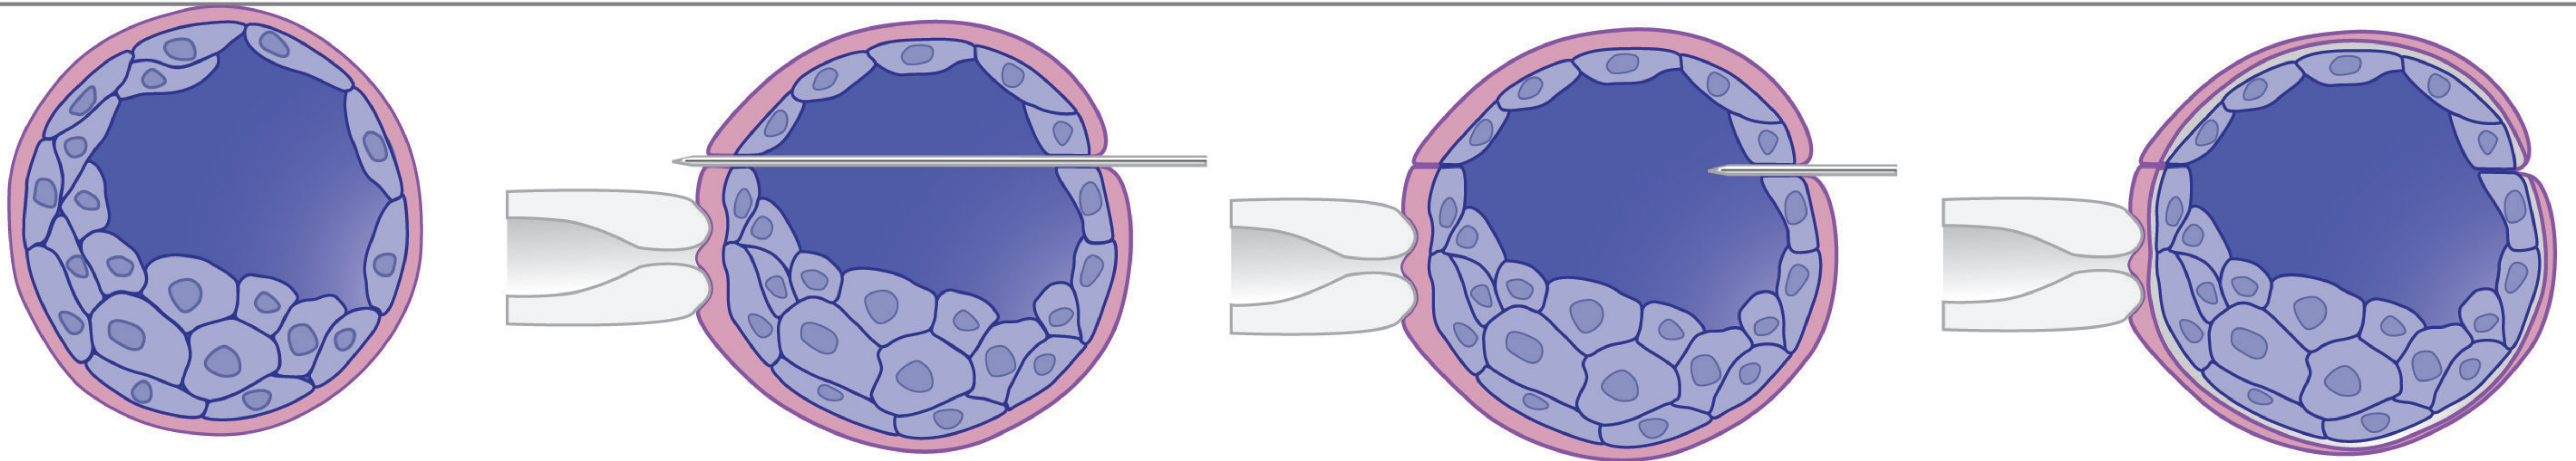

B. Needle Blastocoele Puncture

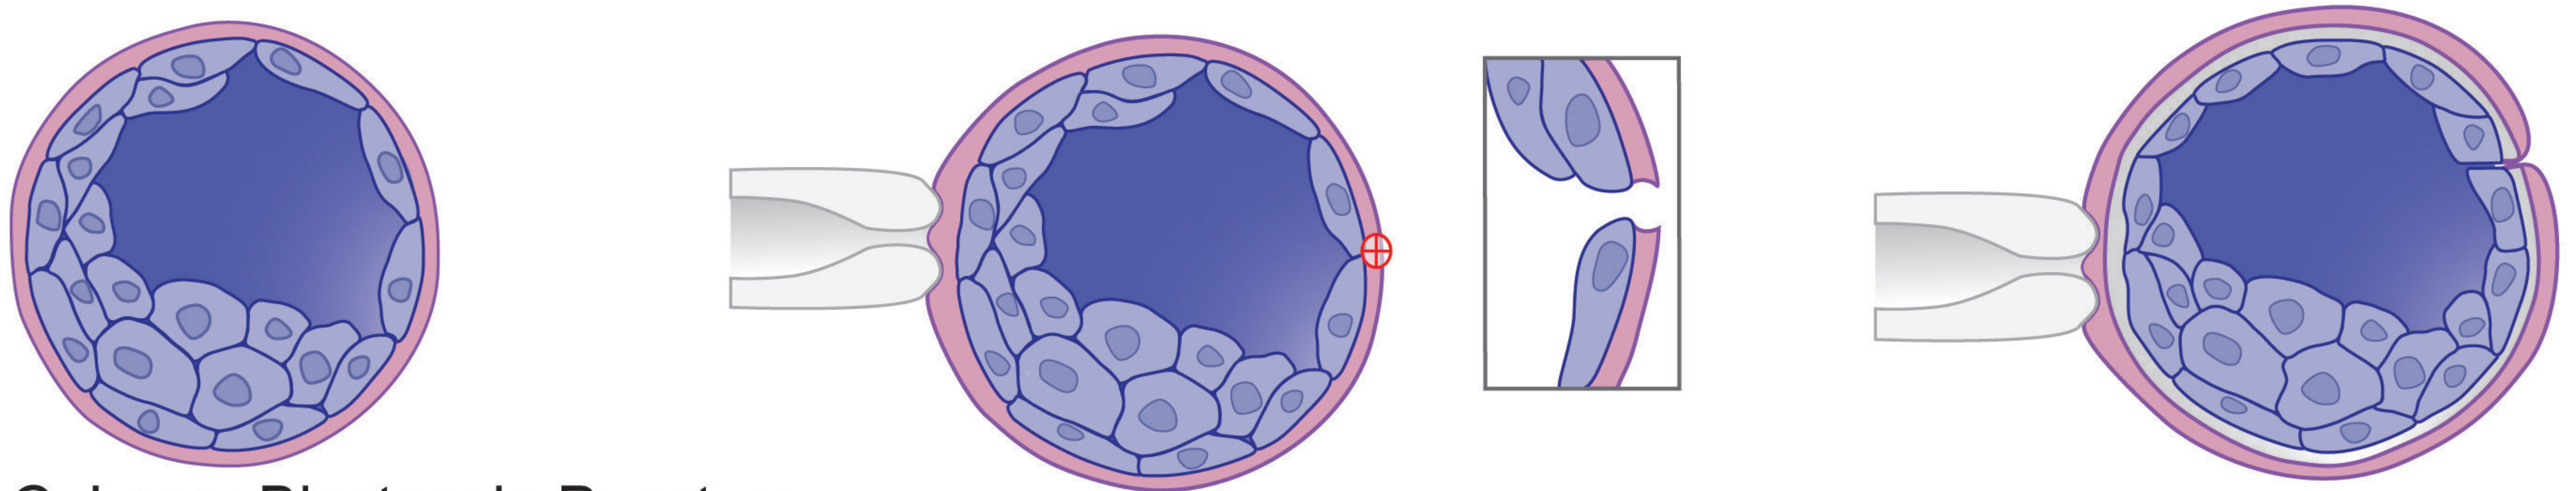

C. Laser Blastocoele Puncture

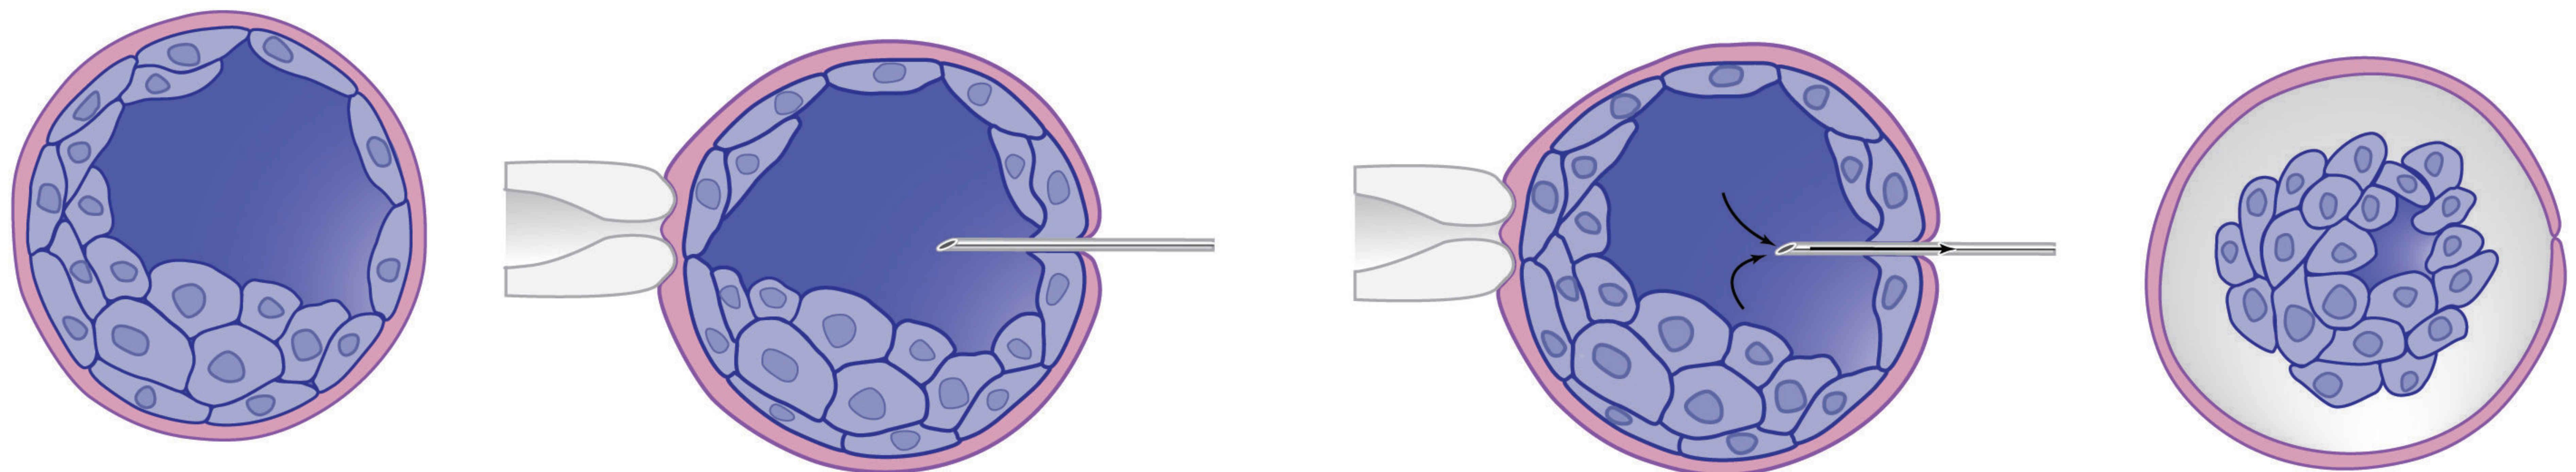

D. Blastocoele Aspiration

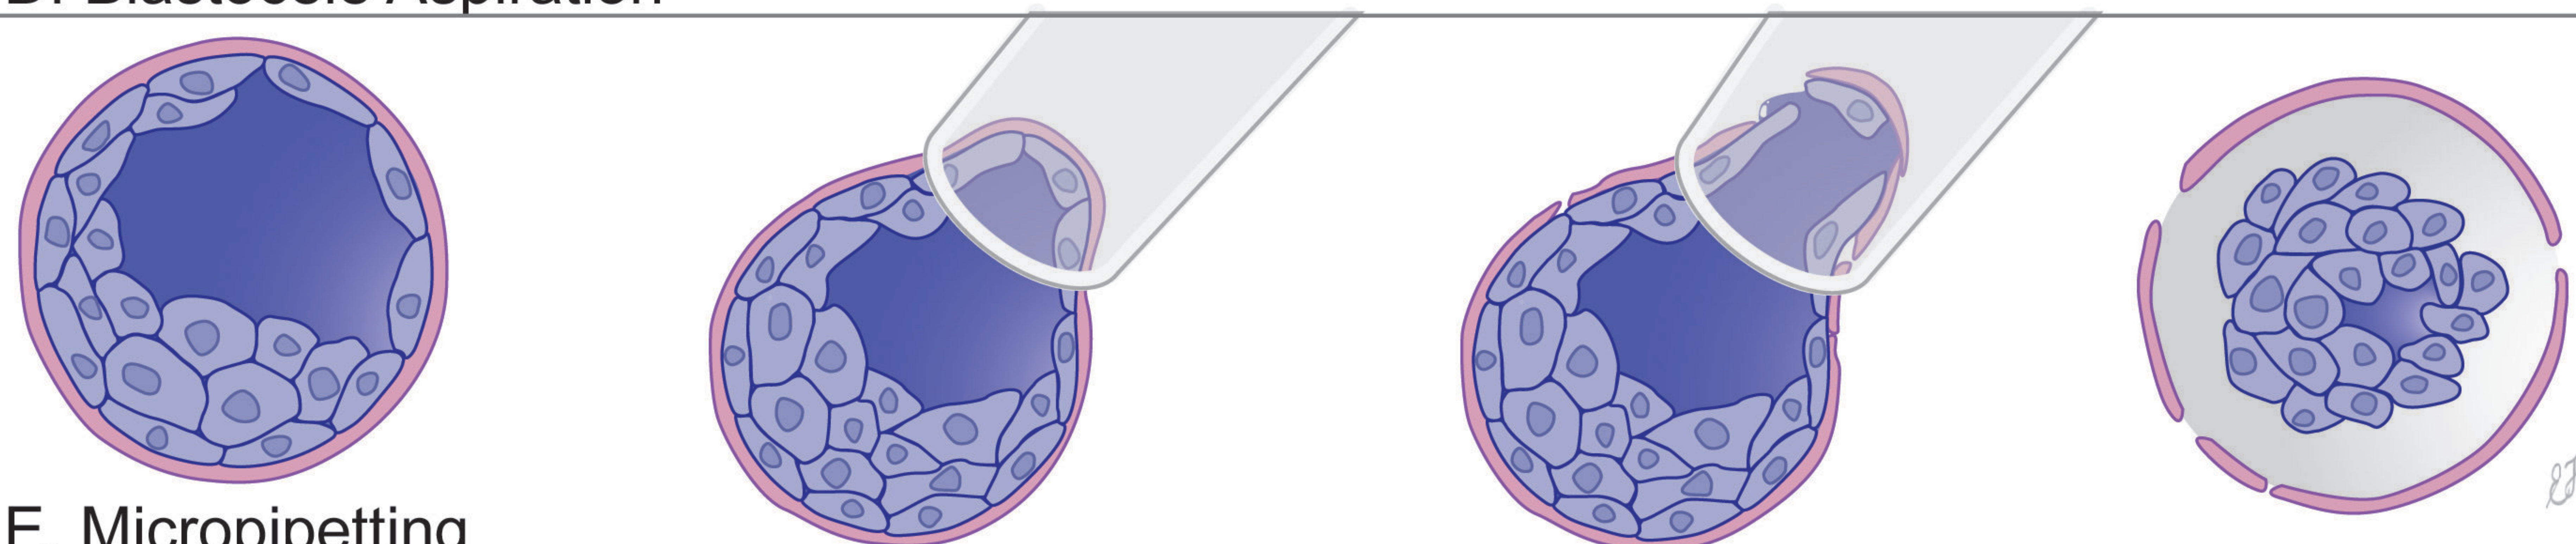

E. Micropipetting
